# Supplementary material for: Efficient N2 electroreduction enabled by linear charge transfer over atomically dispersed W sites
Source: Royal Society of Chemistry journal article supplement (doi:10.1039/d4sc03612c), 2024-01-01
Supplement: d4sc03612c1.pdf [file d4sc03612c1.pdf]

## **Efficient N<sub>2</sub> electroreduction enabled by linear charge transfer over atomically dispersed W sites**

*Jin Wan<sup>a</sup>, Dong Liu<sup>a</sup>, Chuanzhen Feng<sup>a</sup>, Huijuan Zhang<sup>a, b\*</sup>, Yu Wang<sup>a, b\*</sup>*

*<sup>a</sup> The School of Chemistry and Chemical Engineering, Chongqing University, 174 Shazheng Street, Shapingba District, Chongqing City, 400044, P.R. China*

*<sup>b</sup> College of Chemistry and Environmental Science, Inner Mongolia Normal University, Huhehaote, 010022, P. R. China*

*E-mail address: zhanghj@cqu.edu.cn ; wangy@cqu.edu.cn*

## Chemicals

$V_2AlC$  MAX powder ( $\geq 98\%$ , -200 mesh) was purchased from Beijing FUSIMAN Tech Co. Hydrofluoric acid (HF, 40.0% in aq. solution) was ordered from Chengdu Cologne Chemical Co. Tetrabutylammonium Hydroxide (TBAOH, 40% wt) was supplied from Shanghai Titan Scientific Co., Ltd. Tungsten chloride ( $WCl_6$ , 99.9% metals basis) was supplied from Shanghai McLean Biochemical Technology Co. All chemicals were used without any further purification.

## Catalyst preparation

### Synthesis of few-layer $V_{2-x}CT_y$ MXene

1.0 g of high-purity  $V_2AlC$  MAX powder was dispersed in 40 mL HF (40.0% in aq. solution). The etching process was stirred at room temperature for 36 h. The obtained  $V_{2-x}CT_y$  powder was then exfoliated by sonication with TBAOH solution (3 days). Finally, the exfoliated  $V_{2-x}CT_y$  powder was purified several times with distilled water and dried under vacuum for 12 h.

### Synthesis of n-W/ $V_{2-x}CT_y$

First, 100 mg  $V_{2-x}CT_x$  MXene was dispersed in 40 mL distilled water and sonicated for 30 min to form solution A. Solution B was prepared by adding 10 mg of  $WCl_6$  powder to 10 mL of ethanol and sonicated for 30 min. Then, solution B was slowly immersed in solution A and stirred for 12 h. Finally, the obtained n-W/ $V_{2-x}CT_y$  was filtered and washed with distilled water for several times and dried under vacuum for one night.

### Synthesis of WSAC/ $V_{2-x}CT_y$

The synthesis of WSAC/ $V_{2-x}CT_y$  follows a similar pathway as n-W/ $V_{2-x}CT_y$ , with the main difference being the reduced concentration of HF (30.0% in aq. solution) used to etch  $V_2AlC$ . The decrease in HF concentration reduces formation of V vacancy clusters, thereby diminishing the generation of W dual atoms.

### Synthesis of W NPs/ $V_{2-x}CT_y$

W NPs/ $V_{2-x}CT_y$  was synthesized similarly to n-W/ $V_{2-x}CT_y$ , except for the added amount of  $WCl_6$  powder (20 mg).

## Characterization

X-ray diffraction (XRD) data were measured with Cu  $K\alpha$  radiation. X-ray photoelectron spectrometer (XPS, Thermo Scientific ESCALAB 250Xi spectrometer with an Al  $K\alpha$  radiation source) was adopted to determine the W atomic valence state. The metal loadings were tested by

ICP-MS on a VISTA MPX (Varian, Inc.). Field emission scanning electron microscopy (FESEM) and high-angle annular-dark-field scanning transmission electron microscopy (HAADF-STEM) images were performed on JEOL JSM-7800F at 15kV and Talos F200S at 200kV, respectively. The distribution states of W were characterized by an objective spherical aberration-corrected transmission electron microscopy (AC-TEM, FEI Titan ChemiSTEM). The X-ray absorption spectra of the W L3-edge were processed and fitted with Athena and Artemis programs and wavelet-transformed EXAFS plots were processed by Hama Fortran program.

### **Electrochemical measurements**

The NRR measurements were tested on CHI 760E (CH Instruments, Inc., Shanghai) in an H-type cell with a three-electrode system. The as-prepared samples, Ag/ AgCl and Pt foil (1 cm × 1 cm) were the working electrode, reference electrode, and counter electrode, respectively. Before the test, the Nafion membrane was pretreated by boiling in H<sub>2</sub>O<sub>2</sub> (3%) aqueous solution, 0.5 M H<sub>2</sub>SO<sub>4</sub>, and distilled water at 100 °C for 1.5 h. To prepare the working electrode, 5 mg of prepared samples were dispersed into 1000 μL ethanol containing 50 μL of 5 w% Nafion and sonicated for 1 h to obtain the catalyst ink. Subsequently, 80 μL of the n-W/ V<sub>2-x</sub>CT<sub>y</sub> ink was loaded on the carbon paper (1 cm × 1 cm) and dried at room temperature. The electrode potentials were calibrated to the reversible hydrogen electrode (RHE) by using the following equation:

$$E_{RHE} = E_{Ag/AgCl} + 0.197 + 0.059 \times pH$$

Before electrochemical NRR measurement, all the electrolyte (0.05 M H<sub>2</sub>SO<sub>4</sub> solution (pH=1)) was purged with high-purity N<sub>2</sub> (99.999%) for 30 min (flow rate: 20 mL min<sup>-1</sup>).

### **Ammonia quantification**

The concentration of produced NH<sub>3</sub> after electroreduction tests was detected by the indophenol blue method and NMR. For indophenol blue method, 2 mL solution was taken from the cathodic chamber and followed by adding 2 mL NaOH solution containing 5 wt% C<sub>7</sub>H<sub>6</sub>O<sub>3</sub>, and 5 wt% C<sub>6</sub>H<sub>5</sub>Na<sub>3</sub>O<sub>7</sub>. Sequentially, 0.05 M NaClO (1 mL) and 1 wt% C<sub>5</sub>FeN<sub>6</sub>Na<sub>2</sub>O (0.2 mL) aqueous solution were added into the above mixed solution. After 2 h of reaction, the solution was measured at 655 nm using UV-Vis absorption spectra. For NMR, <sup>15</sup>N<sub>2</sub> was used as the feeding gas, after 8 h of N<sub>2</sub> electroreduction, the electrolyte was taken out and further quantified by <sup>1</sup>H NMR.

## Hydrazine quantification

The concentration of  $N_2H_4$  electrolyte was determined by the method of Watt and Chrisp. Briefly, 5.99 g  $C_9H_{11}NO$  and 30 ml of HCl in 300 ml ethanol were mixed and prepared as a color reagent. Then, 5 mL electrolyte was taken from the cathodic chamber and 5 mL color reagent was added. After the reaction for 20 min, the UV-Vis absorption spectra was measured at 458 nm.

## Calculation of $NH_3$ yields and the Faradaic efficiency

The  $NH_3$  yields were calculated by the following equation:

$$v_{NH_3} = (c_{NH_3} \times V) / (t \times m_{cat.})$$

The Faradaic efficiency (FE) was calculated as follows:

$$FE = (3 \times F \times c_{NH_3} \times V) / (17 \times Q)$$

where  $c_{NH_3}$  is the measured  $NH_4^+$  concentration ( $\mu g mL^{-1}$ );  $V$  is the volume of electrolyte (mL);  $t$  is the electrolysis time (h);  $m_{cat.}$  is the mass loading of the catalyst on the carbon paper;  $F$  is the faraday constant ( $96\,500\ C\ mol^{-1}$ ); and  $Q$  is the quantity of applied electricity (C).

## Computational Methods

All calculations were performed by spin polarization density functional theory (DFT) as implemented in the Vienna ab initio Simulation Package (VASP).<sup>1-3</sup> The core electrons were expanded by the Projected Augmented Wave (PAW) approach.<sup>4</sup> The generalized gradient approximation (GGA) with Perdew-Burke-Ernzerhof (PBE) functional was applied.<sup>5</sup> The DFT-D3 method was used to treat van der Waals (vdW) interactions in the systems.<sup>6</sup> A cutoff energy of 500 eV was applied for the plane-wave basis. The convergence criterion for energy and force were set to  $10^{-5}$  eV and  $0.03\ eV/\text{\AA}$ , respectively. A vacuum gap of  $15\ \text{\AA}$  was utilized to avoid the interaction between the periodic images. The Brillouin zone was sampled using a  $2 \times 2 \times 1$  and  $4 \times 4 \times 1$  gamma ( $\Gamma$ ) k-mesh for geometry optimization and electronic properties calculations, respectively. The Gibbs free energy change ( $\Delta G$ ) for each reaction was calculated by the formula:

$$\Delta G = \Delta E + \Delta E_{ZPE} + T\Delta S$$

Where  $\Delta E$ ,  $\Delta E_{ZPE}$ , and  $\Delta S$  are the changes of calculation energy, the zero-point energy difference, and the entropy change, respectively.

Furthermore, the limiting potential was calculated by the equation:

$$\eta^{NRR} = \Delta G/e.$$

The adsorption energy ( $E_{ads}$ ) of adsorbate was calculated according to the equation:

$$E_{ads} = E_{sub/ads} - E_{sub} - E_{ads}$$

where  $E_{sub/ads}$ ,  $E_{sub}$ ,  $E_{ads}$  are energies of the substrate with adsorbate, the isolated substrate, and the corresponding adsorbate, respectively.

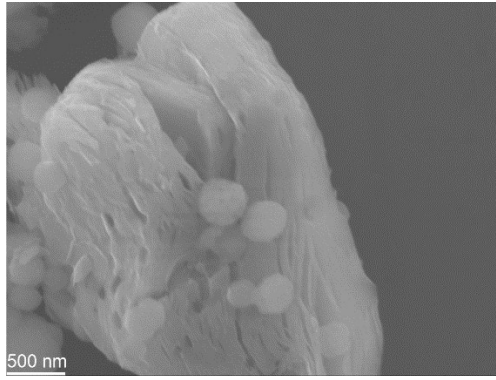

**Figure S1.** SEM image of multi-layer  $V_{2-x}CT_y$  nanosheets.

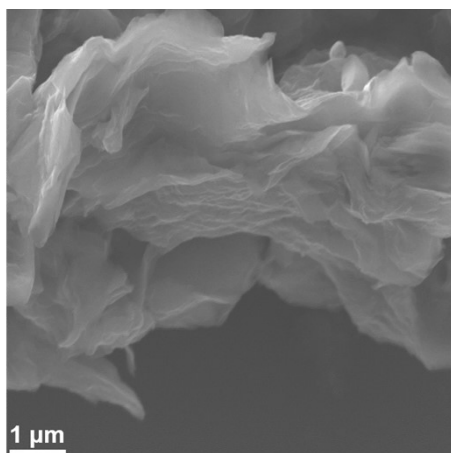

**Figure S2.** SEM image V<sub>2-x</sub>CT<sub>y</sub> nanosheets after exfoliation.

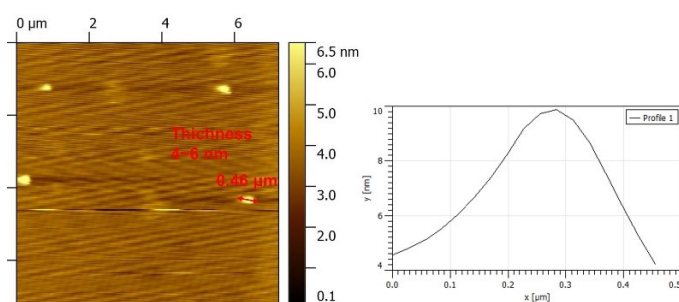

**Figure S3.** AFM image of V<sub>2-x</sub>CT<sub>y</sub> nanosheets after exfoliation.

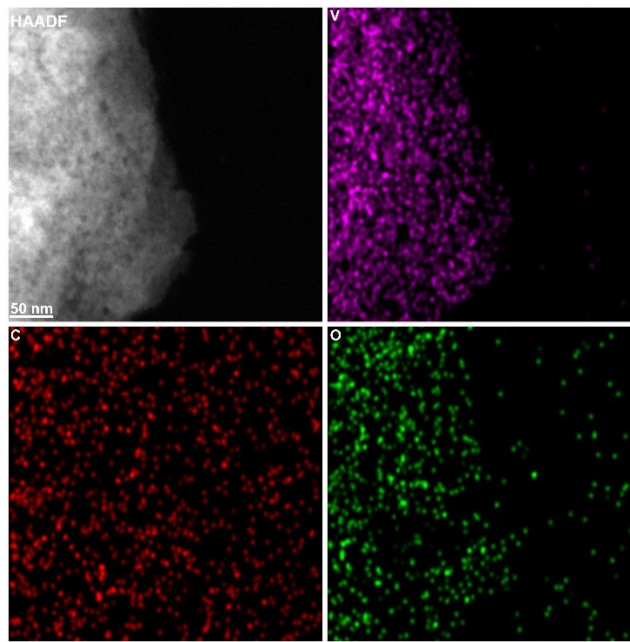

**Figure S4.** HAADF-STEM image and its EDS elemental mapping for elements V, C, and O of few-layer  $V_{2-x}CT_y$  nanosheets.



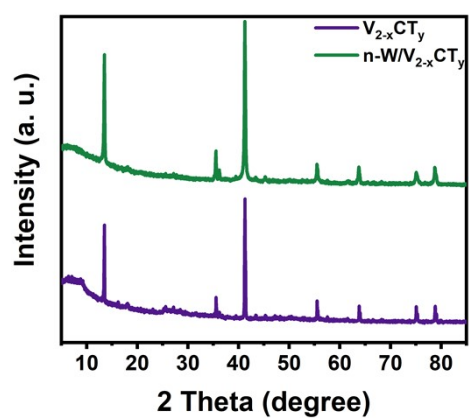

**Figure S5.** XRD diagrams of  $V_{2-x}CT_y$  and  $n\text{-W}/V_{2-x}CT_y$ .

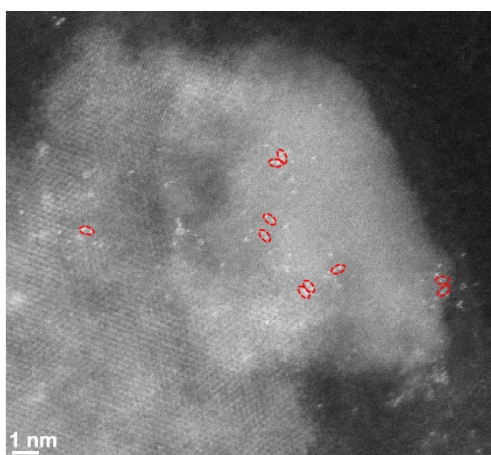

**Figure S6.** Atomic-resolution HAADF-STEM image of atomically dispersed W atoms on  $V_{2-x}CT_y$  surface.

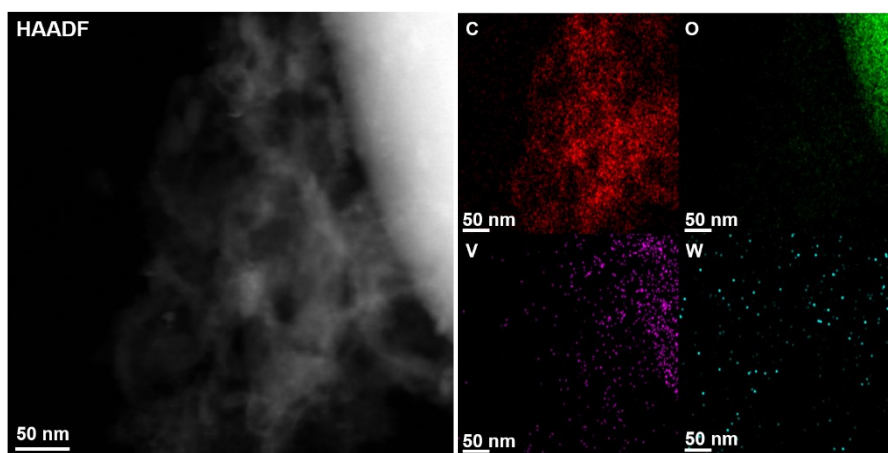

**Figure S7.** HAADF-STEM image and its EDS elemental mapping for elements V, C, O, and W of  $\text{WSAC}/\text{V}_{2-x}\text{CT}_y$ .

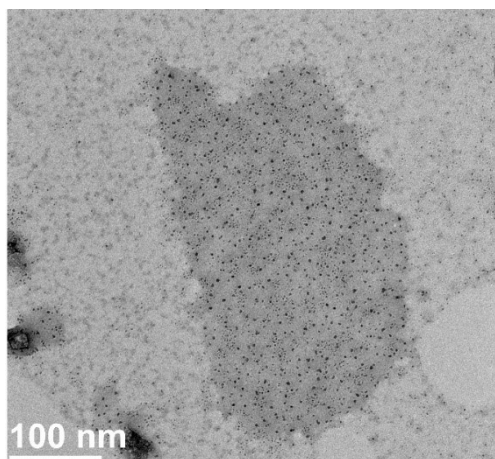

**Figure S8.** STEM image of W NPs/V<sub>2-x</sub>CT<sub>y</sub>.

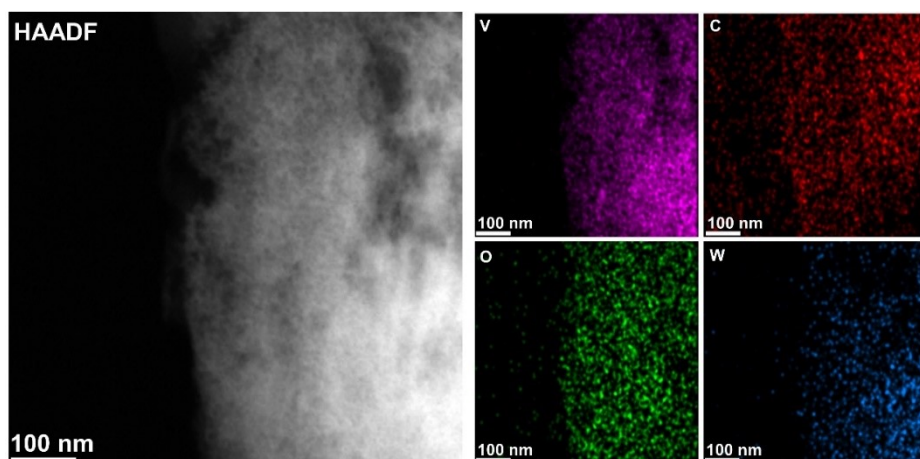

**Figure S9.** HAADF-STEM image and its EDS elemental mapping for elements V, C, O, and W of  $W\ NPs/V_{2-x}CT_y$ .

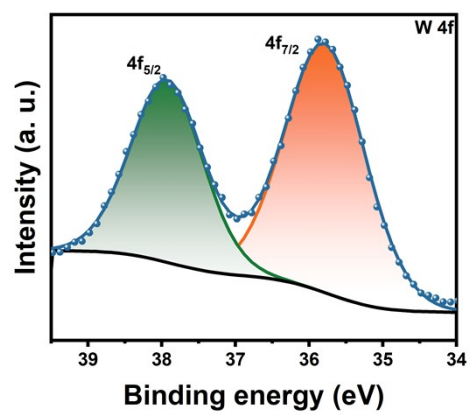

**Figure S10.** W 4f XPS spectrum of n-W/V<sub>2-x</sub>CT<sub>y</sub>.

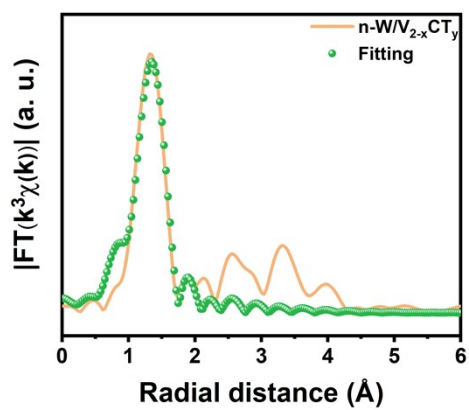

**Figure S11.** W K edge EXAFS fitting results in k space based on the theoretical model of WDAC/V<sub>2-x</sub>CT<sub>y</sub> for n-W/V<sub>2-x</sub>CT<sub>y</sub>.

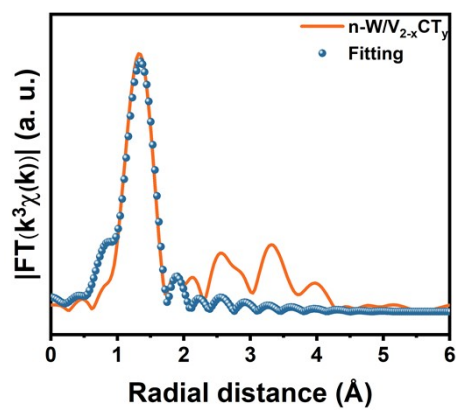

**Figure S12.** FT-EXAFS fitting results of  $n\text{-W}/V_{2-x}\text{CT}_y$  in R space based on the theoretical model of  $\text{WSAC}/V_{2-x}\text{CT}_y$ .



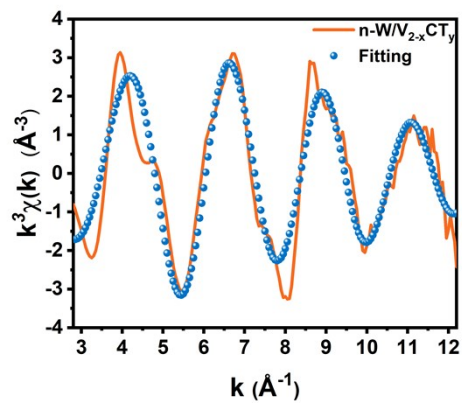

**Figure S13.** W K edge EXAFS fitting results in k space based on the theoretical model of WSAC/ $V_{2-x}\text{CT}_y$  for  $n\text{-W}/V_{2-x}\text{CT}_y$ .

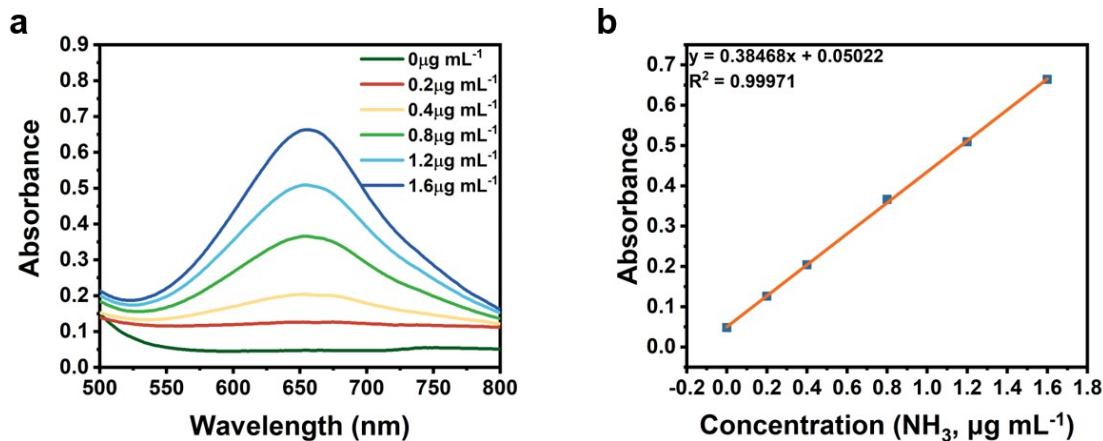

**Figure S14.** (a) UV-vis curves of indophenol assays with  $\text{NH}_4^+$  ions (ammonium chloride solutions of known concentration) after being incubated for 2 h at room temperature. (b) calibration curve used for estimation of  $\text{NH}_3$  by  $\text{NH}_4^+$  ion concentration. The absorbance at 655 nm was measured by UV-vis spectrophotometer. The standard curve showed good linear relation of absorbance with  $\text{NH}_4^+$  ion concentration ( $y = 0.38468x + 0.05022$ ,  $R^2 = 0.99971$ ).

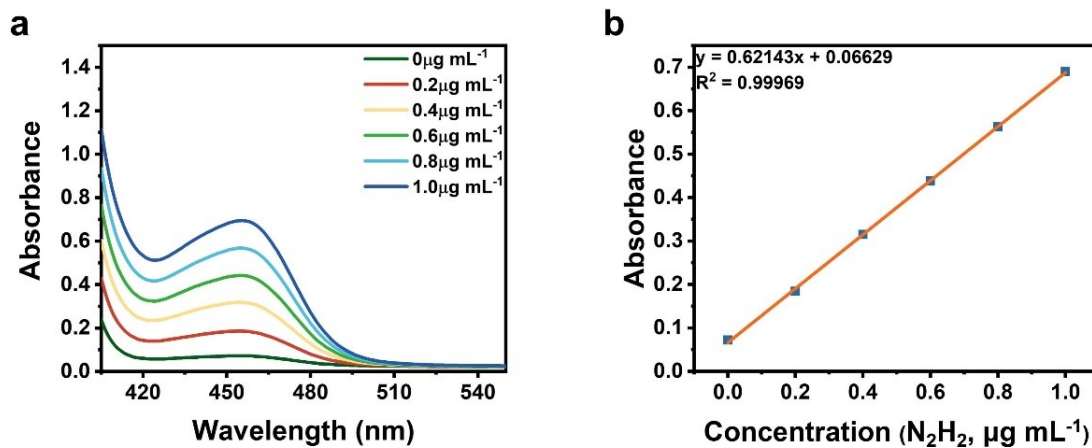

**Figure S15.** (a) UV-Vis absorption spectra of various  $N_2H_4$  concentration after incubated for 20 min at room temperature. (b) Calibration curve used for calculation of  $N_2H_4$  concentration. The absorbance at 458 nm was measured by UV-vis spectrophotometer. The standard curve showed good linear relation of absorbance with  $N_2H_4$  ion concentration ( $y = 0.62143x + 0.06629$ ,  $R^2 = 0.99969$ ).

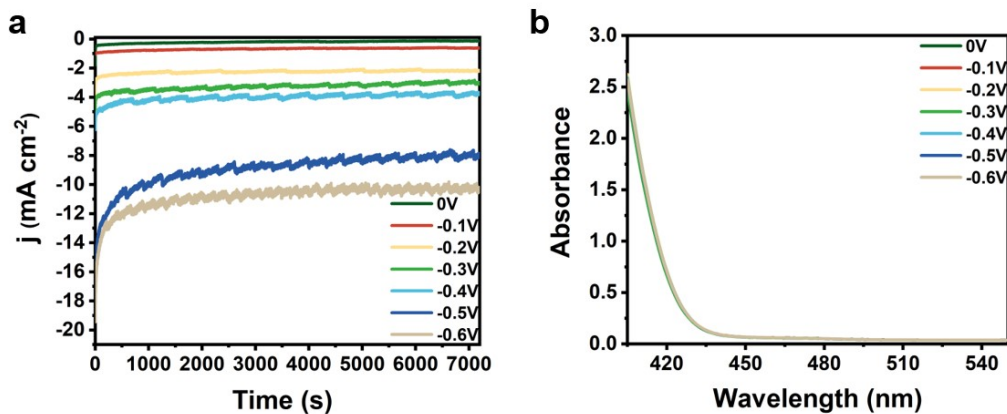

**Figure S16.** (a) Chronoamperometry curves of n-W/V<sub>2-x</sub>CT<sub>y</sub> at different applied potentials in N<sub>2</sub>-saturated 0.05 M H<sub>2</sub>SO<sub>4</sub> solution. (b) UV-Vis absorption spectra of the electrolytes stained with para-dimethylamino-benzaldehyde indicator after 20 min electrolysis in N<sub>2</sub> at various potentials under ambient conditions.

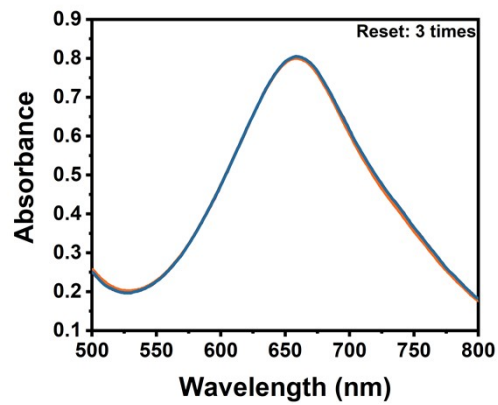

**Figure S17.** UV-Vis absorption spectra of n-W/V<sub>2-x</sub>CT<sub>y</sub> at -0.1V (versus RHE) for 3 times.

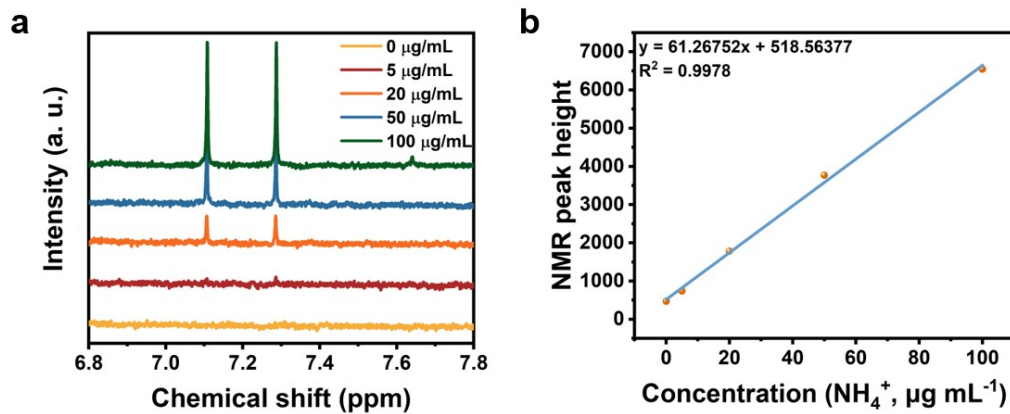

**Figure S18.** (a)  $^1\text{H}$  NMR spectra of standard ammonia solution. (b) The standard curve of NMR peak height against  $\text{NH}_4^+$  concentration.

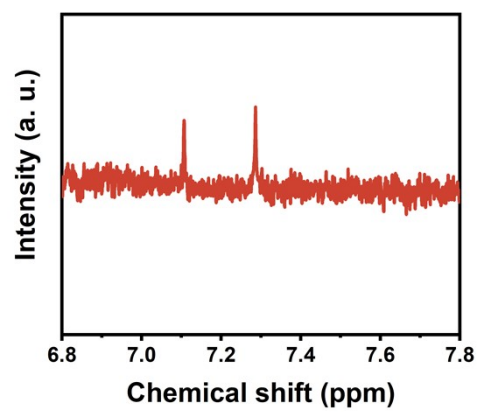

**Figure S19.** <sup>1</sup>H NMR spectra of the electrolyte over n-W/V<sub>2-x</sub>CT<sub>y</sub> for NRR at -0.1 V (versus RHE) for 8 h.

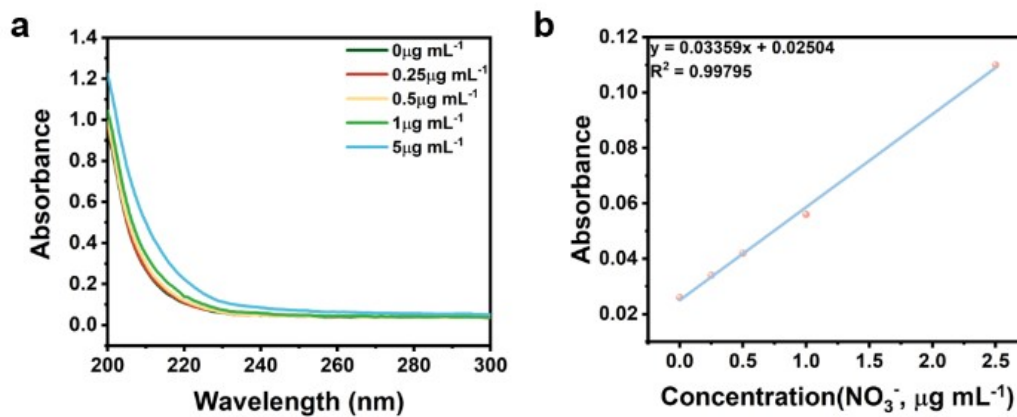

**Figure S20.** (a) UV-Vis absorption spectra of various  $\text{NO}_3^-$  concentration after incubated for 20 min at room temperature. (b) Calibration curve used for calculation of  $\text{NO}_3^-$  concentration.



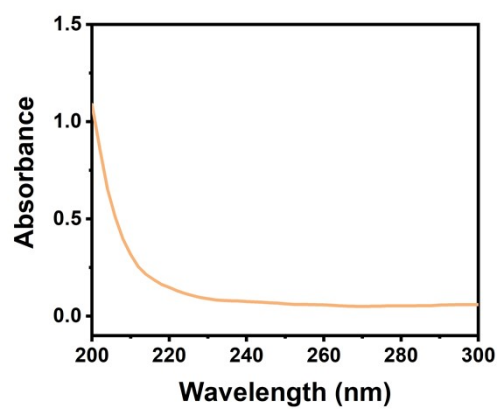

**Figure S21.** UV-Vis absorption spectra of  $\text{NO}_3^-$  for  $\text{n-W/V}_{2-x}\text{CT}_y$  at  $-0.1$  V (versus RHE).

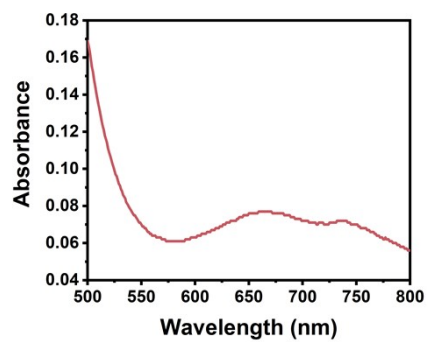

**Figure S22.** UV-Vis absorption spectra of  $\text{NH}_4^+$  for  $\text{n-W/V}_{2-x}\text{CT}_y$  at  $-0.1\text{V}$  (versus RHE) under Ar atmosphere.

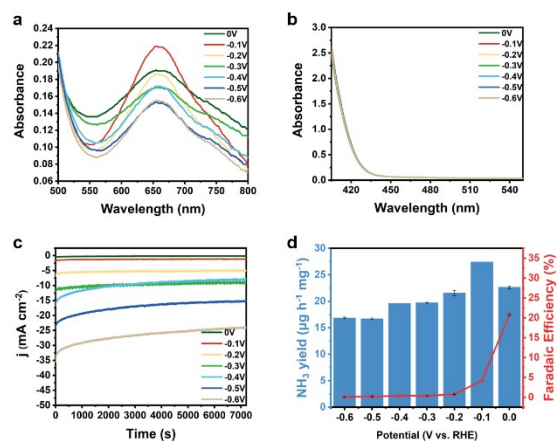

**Figure S23.** Electrochemical evaluation of  $V_{2-x}CT_y$  (a) UV-Vis absorption spectra of indophenol assays with  $NH_4^+$  after incubated for 2 h at different potentials. (b) UV-Vis absorption spectra of para-dimethylamino-benzaldehyde assays  $N_2H_4$  after incubated for 20 min at different potentials. (c) Chronoamperometry curves of  $V_{2-x}CT_y$  at different applied potentials in  $N_2$ -saturated 0.05 M  $H_2SO_4$  solution. (d)  $NH_3$  yields and FEs at different applied potentials.

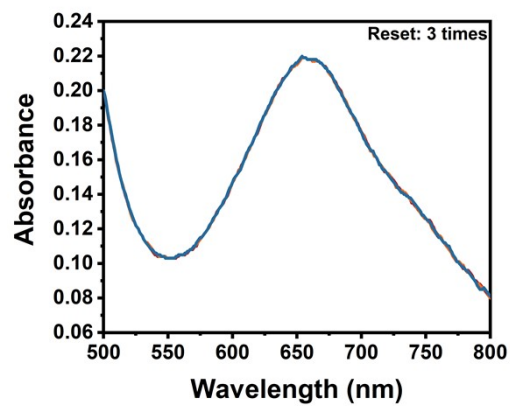

**Figure S24.** UV-Vis absorption spectra of  $V_{2-x}CT_y$  at  $-0.1V$  (versus RHE) for 3 times.

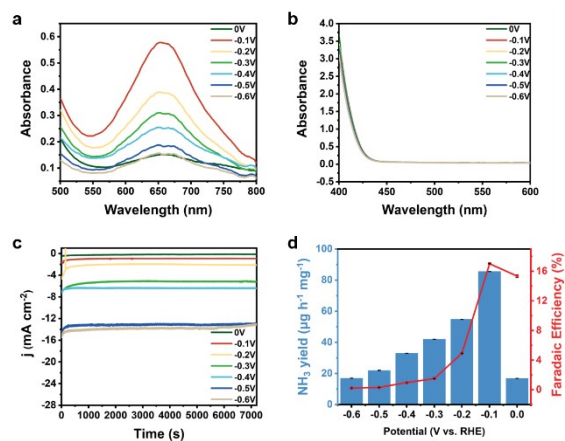

**Figure S25.** Electrochemical evaluation of WSAC/V<sub>2-x</sub>CT<sub>y</sub> (a) UV-Vis absorption spectra of indophenol assays with NH<sub>4</sub><sup>+</sup> after incubated for 2 h at different potentials. (b) UV-Vis absorption spectra of para-dimethylamino-benzaldehyde assays N<sub>2</sub>H<sub>4</sub> after incubated for 20 min at different potentials. (c) Chronoamperometry curves of WSAC/V<sub>2-x</sub>CT<sub>y</sub> at different applied potentials in N<sub>2</sub>-saturated 0.05 M H<sub>2</sub>SO<sub>4</sub> solution. (d) NH<sub>3</sub> yields and FEs at different applied potentials.

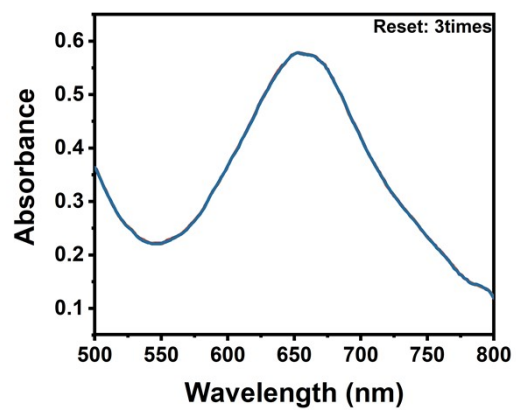

**Figure S26.** UV-Vis absorption spectra of WSACV<sub>2-x</sub>CT<sub>y</sub> at -0.1V (versus RHE) for 3 times.

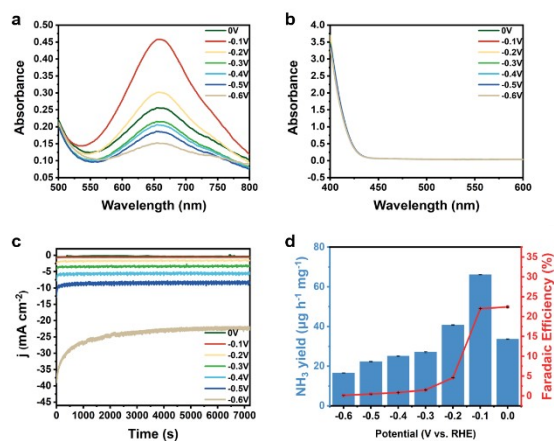

**Figure S27.** Electrochemical evaluation W NPs/V<sub>2-x</sub>CT<sub>y</sub> (a) UV-Vis absorption spectra of indophenol assays with NH<sub>4</sub><sup>+</sup> after incubated for 2 h at different potentials. (b) UV-Vis absorption spectra of para-dimethylamino-benzaldehyde assays N<sub>2</sub>H<sub>4</sub> after incubated for 20 min at different potentials. (c) Chronoamperometry curves of W NPs/V<sub>2-x</sub>CT<sub>y</sub> at different applied potentials in N<sub>2</sub>-saturated 0.05 M H<sub>2</sub>SO<sub>4</sub> solution. (d) NH<sub>3</sub> yields and FEs at different applied potentials.

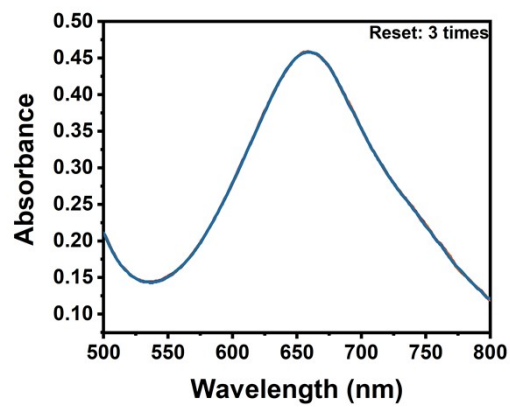

**Figure S28.** UV-Vis absorption spectra of W NPs/V<sub>2-x</sub>CT<sub>y</sub> at -0.1V (versus RHE) for 3 times.



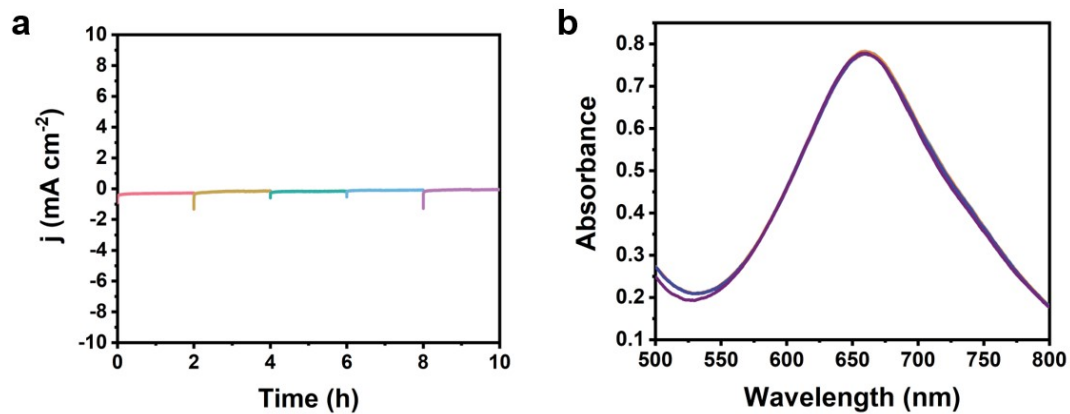

**Figure S29.** (a) Chronoamperometry curves in cycle tests of n-W/V<sub>2-x</sub>CT<sub>y</sub> at -0.1V (versus RHE). (b) UV-Vis absorption spectra of indophenol assays in five cycles over n-W/V<sub>2-x</sub>CT<sub>y</sub> at -0.1V (versus RHE).

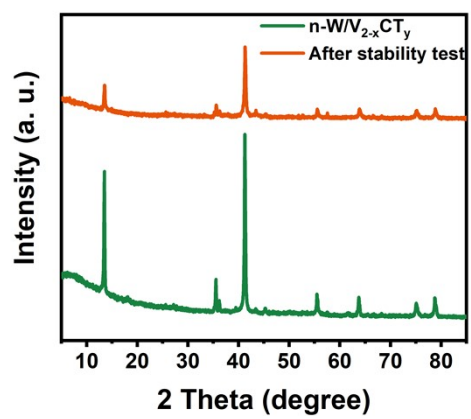

**Figure S30.** XRD diagrams of  $n\text{-W}/\text{V}_{2-x}\text{CT}_y$  before and after stability test.

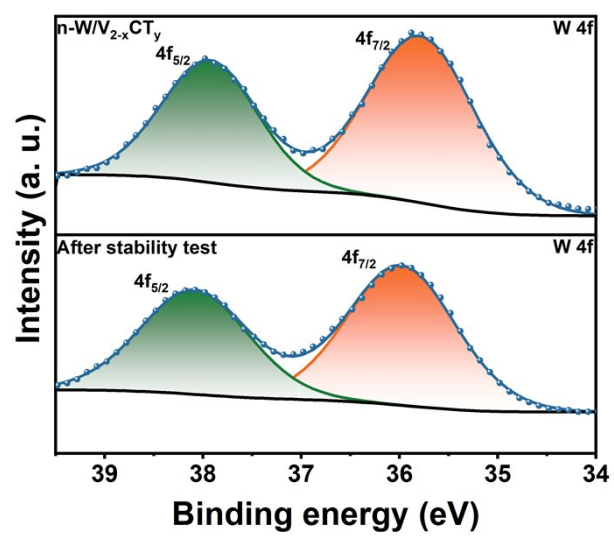

**Figure S31.** W 4f XPS spectrum of n-W/V<sub>2-x</sub>CT<sub>y</sub> before and after stability test.

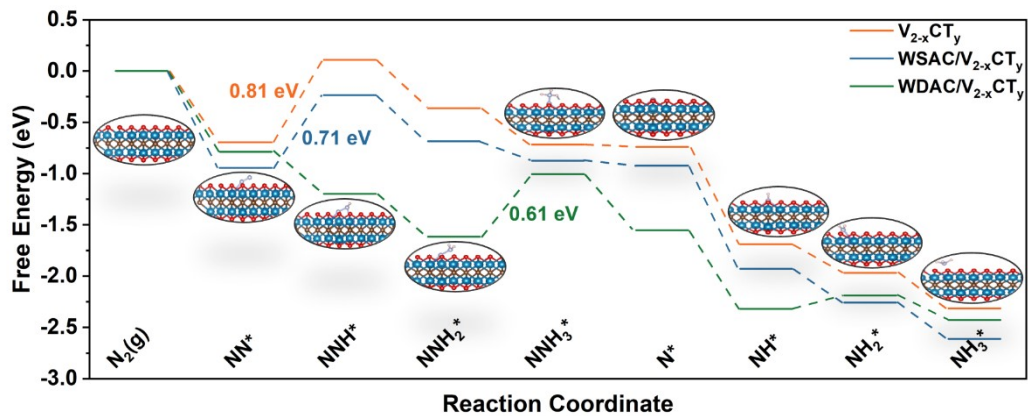

**Figure S32.** Gibbs free energy diagrams of NRR via distal pathways on  $V_{2-x}CT_y$ ,  $WSAC/V_{2-x}CT_y$ , and  $WDAC/V_{2-x}CT_y$ , respectively.

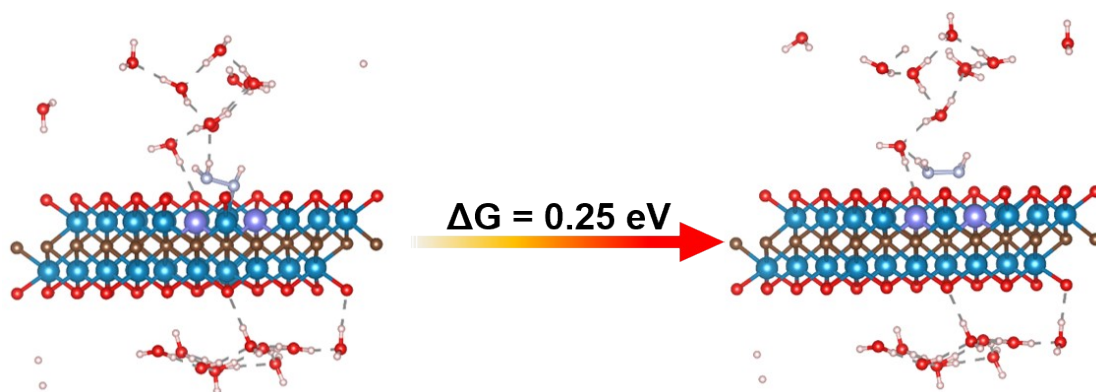

**Figure 33.** The explicit solvation model of  $\text{NHH}_2^* \rightarrow \text{NH}_2\text{NH}_2^*$  step.

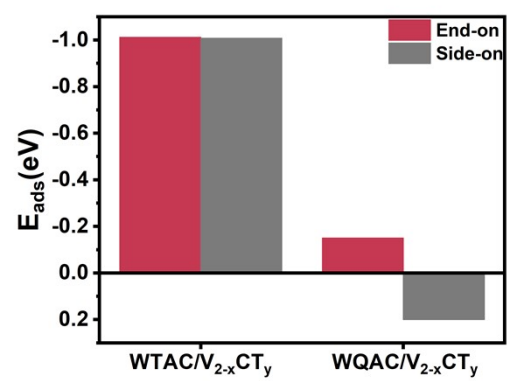

**Figure S34.** The adsorption energies of  $N_2$  on WTAC/ $V_{2-x}CT_y$ , and WQAC/ $V_{2-x}CT_y$  by side-on and end-on configurations, respectively.

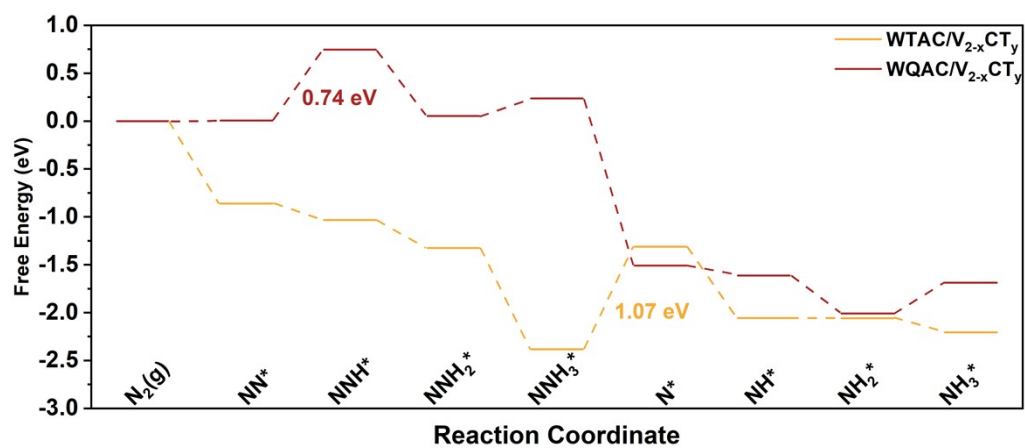

**Figure S35.** Gibbs free energy diagrams of NRR via distal pathways on WTAC/ $V_{2-x}CT_y$ , and WQAC/ $V_{2-x}CT_y$ , respectively.

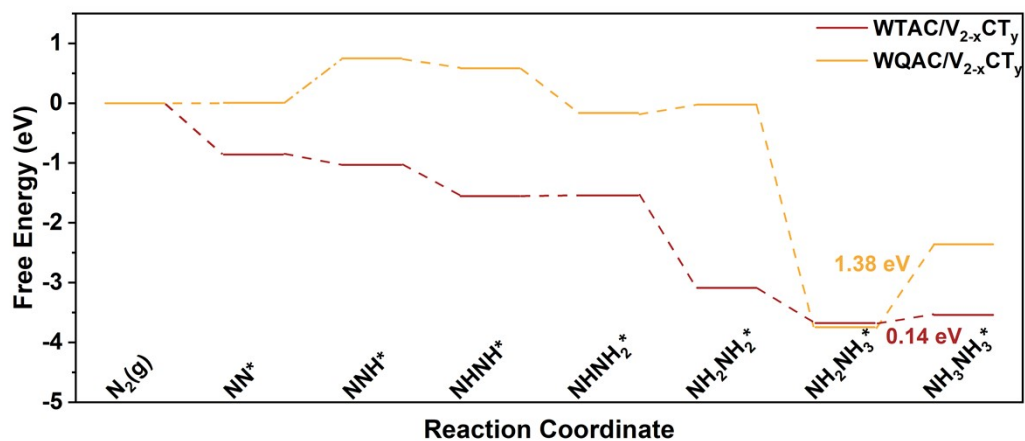

**Figure S36.** Gibbs free energy diagrams of NRR via alternating pathways on WTAC/ $V_{2-x}CT_y$ , and WQAC/ $V_{2-x}CT_y$ , respectively.



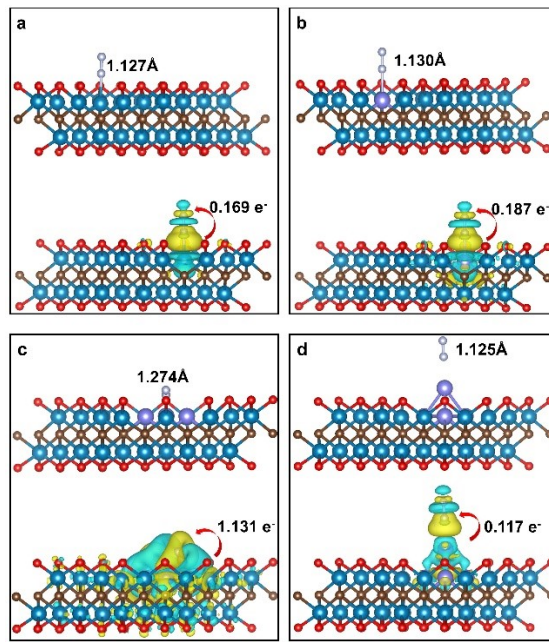

**Figure S37.** Optimized structures and charge density differences of  $N_2$  on  $V_{2-x}CT_y$ ,  $WSAC/V_{2-x}CT_y$ ,  $WTAC/V_{2-x}CT_y$ , and  $WQAC/V_{2-x}CT_y$  surfaces (Cyan and yellow represent charge depletion and accumulation, respectively. The isosurface value is  $0.001 e/\text{\AA}^3$ )

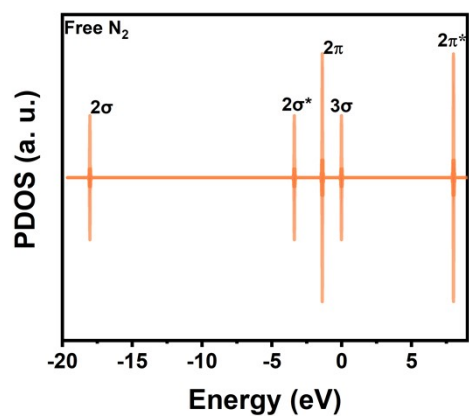

Figure S38. PDOS of free N<sub>2</sub>.

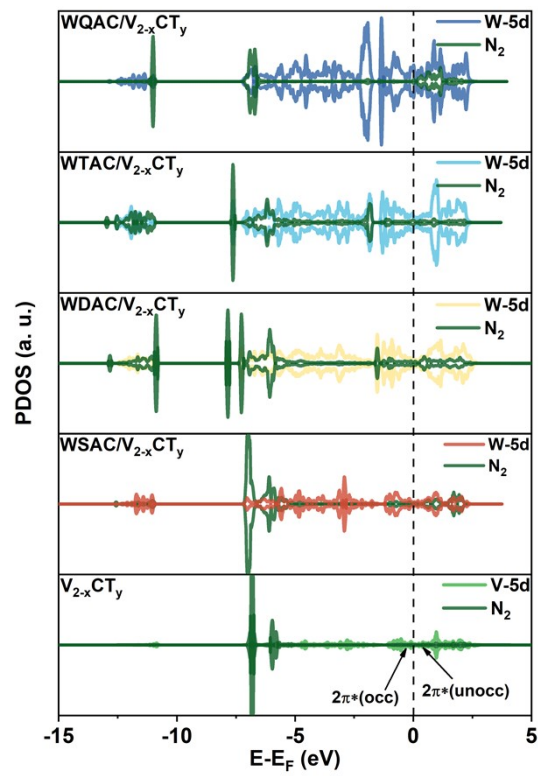

**Figure S39.** PDOS of  $N_2$  on  $V_{2-x}CT_y$ ,  $WSAC/V_{2-x}CT_y$ ,  $WDAC/V_{2-x}CT_y$ ,  $WTAC/V_{2-x}CT_y$ , and  $WQAC/V_{2-x}CT_y$  surface.

**TableS1.** W loadings of the studied n-W/V<sub>2</sub>CO<sub>x</sub> catalyst and W NPs/ V<sub>2</sub>CO<sub>x</sub>, as determined by ICP-OES.

| <b>Catalysts</b>                       | <b>Quality of WCl<sub>6</sub> (mg)</b> | <b>W loading (wt%)</b> |
|----------------------------------------|----------------------------------------|------------------------|
| V <sub>2-x</sub> CT <sub>y</sub>       | 0                                      | 0                      |
| n-W/V <sub>2-x</sub> CT <sub>y</sub>   | 10 mg                                  | 1.39                   |
| W NPs/V <sub>2-x</sub> CT <sub>y</sub> | 20 mg                                  | 5.12                   |

**TableS2.** Curve fit parameters of W K-edge EXAFS based on WSAC/ W/V<sub>2-x</sub>CT<sub>y</sub> and WDAC/ W/V<sub>2-x</sub>CT<sub>y</sub> for n-W/V<sub>2-x</sub>CT<sub>y</sub>.

| Sample                                | Path | N <sup>b</sup> | R(Å <sup>c</sup> ) | σ(10 <sup>-3</sup> Å <sup>2d</sup> ) | ΔE <sub>0</sub> (eV) | R factor |
|---------------------------------------|------|----------------|--------------------|--------------------------------------|----------------------|----------|
| WSAC/V <sub>2-x</sub> CT <sub>y</sub> | W-C  | 3.62±0.72      | 1.97±0.02          | 5.06±3.1                             | -9.13±4.30           | 0.0189   |
| WDAC/V <sub>2-x</sub> CT <sub>y</sub> | W-C  | 3.61±0.71      | 1.98±0.02          | 5.10±3.1                             | -9.22±4.25           | 0.0187   |

S<sub>0</sub><sup>2</sup> was fixed as 1.0. Data ranges 3.0≤k≤12.0 Å<sup>-1</sup>, 1.0≤R≤2.0 Å. <sup>b</sup>N is the coordination number; <sup>c</sup>R is interatomic distance; <sup>d</sup>σ<sup>2</sup> is Debye-Waller factor; ΔE<sub>0</sub> is edge-energy shift. R factor is residual factor.

**Table S3.** Solvation energies ( $E_{solv}$ ) of the catalytic reaction intermediates,  $\eta/vac$  and  $\eta/sol$  for the potential-limiting step of WDAC/ $V_{2-x}CT_y$ .

|         | $E_{solv}$ (eV) | $\eta/vac$ (eV) | $\eta/sol$ (eV) |
|---------|-----------------|-----------------|-----------------|
| NN*     | -0.52           | -0.14           | -0.41           |
| NNH*    | -0.66           |                 |                 |
| NHNHH*  | -1.39           | -0.77           | 0.32            |
| NHHNHH* | -2.16           |                 |                 |

## References

1. G. Kresse and J. Furthmuller, *Comp. Mater. Sci.*, 1996, **6**, 15-50.
2. G. Kresse and J. Furthmuller, *Phys. Rev. B*, 1996, **54**, 11169-11186.
3. G. Kresse and D. Joubert, *Phys. Rev. B*, 1999, **59**, 1758-1775.
4. P. E. Blochl, *Phys. Rev. B*, 1994, **50**, 17953-17979.
5. J. P. Perdew, K. Burke and M. Ernzerhof, *Phys. Rev. Lett.*, 1996, **77**, 3865-3868.
6. S. Grimme, J. Antony, S. Ehrlich and H. Krieg, *J. Chem. Phys.*, 2010, **132**, 154104.
